# Supplementary material
Source: PubMed Central journal article supplement (PMC10211458)
Supplement: NIHMS1898489-supplement-SourceData-Extended_DataFig3B.pdf [file NIHMS1898489-supplement-SourceData-Extended_DataFig3B.pdf]

Extended data Figure 3B

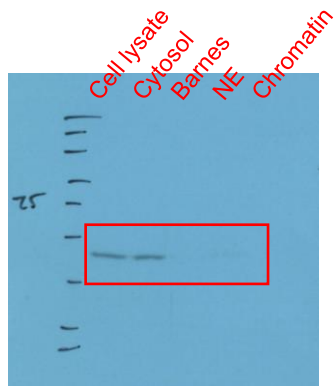

Rb anti-Calreticulin  
(50 kDa)

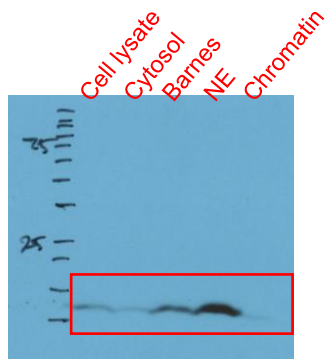

Rb anti-FLAP  
(17 kDa)

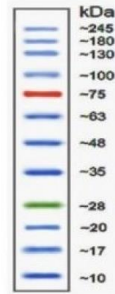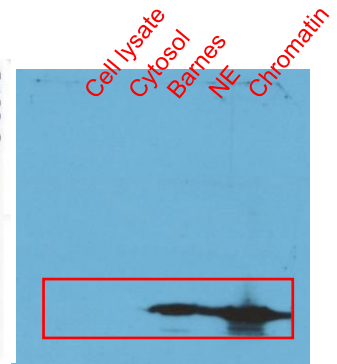

Ms anti-Histone H3  
(18 kDa)

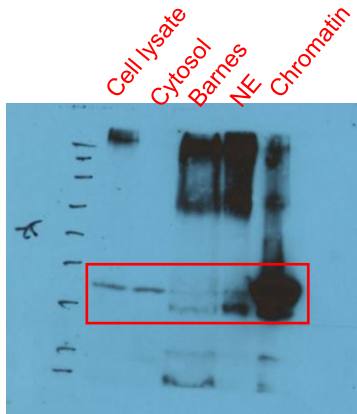

Rb anti-LBR  
(65 kDa)

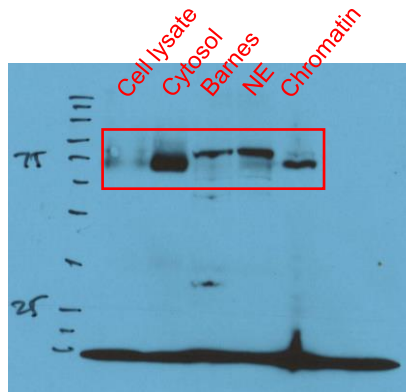

Rb anti-5-LO  
(75 kDa)

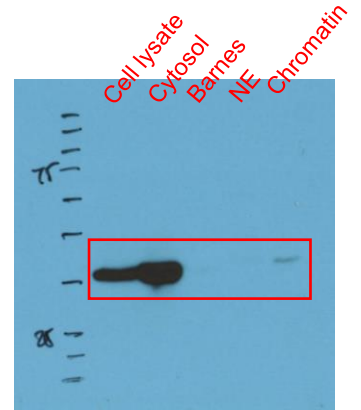

Ms anti-GAPDH  
(36 kDa)
