# Supplementary material
Source: PubMed Central journal article supplement (PMC10211458)
Supplement: NIHMS1898489-supplement-SourceData_Fig2E.pdf [file NIHMS1898489-supplement-SourceData_Fig2E.pdf]

Figure 2E

Rb anti-FLAP

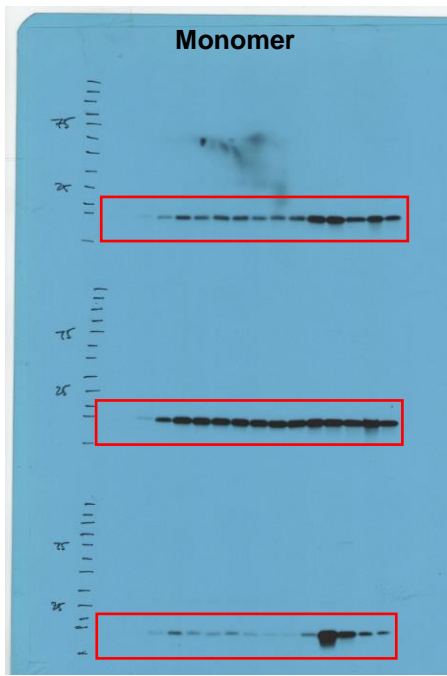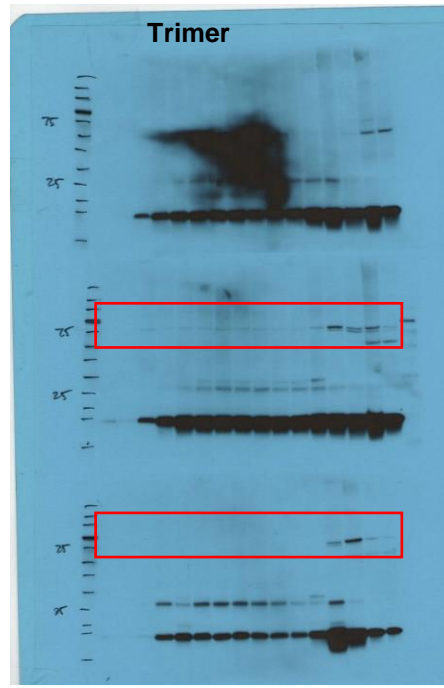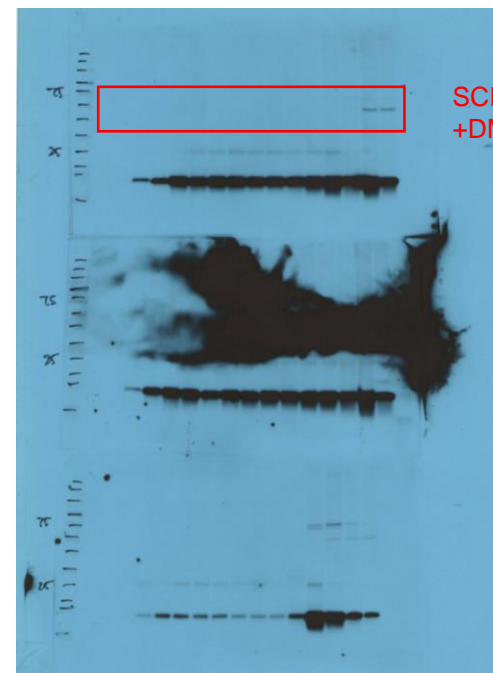

Rb anti-Flotillin 2 (50 kDa)

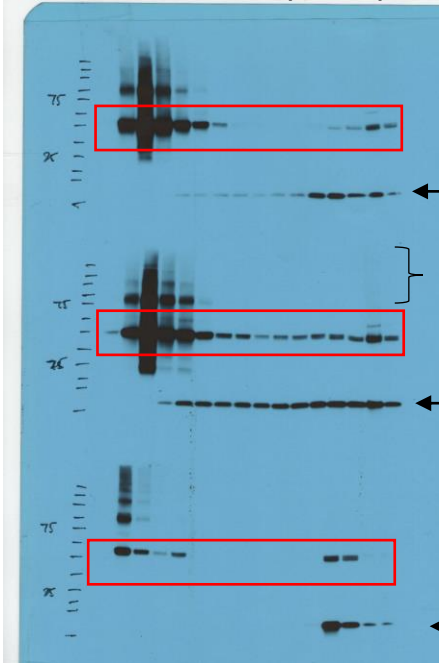

Unstripped FLAP (monomer)

Flotillin 2 oligomers

Unstripped FLAP (monomer)

Unstripped FLAP (monomer)

Figure 2E

Ms anti-Lamin B1 (75 kDa)

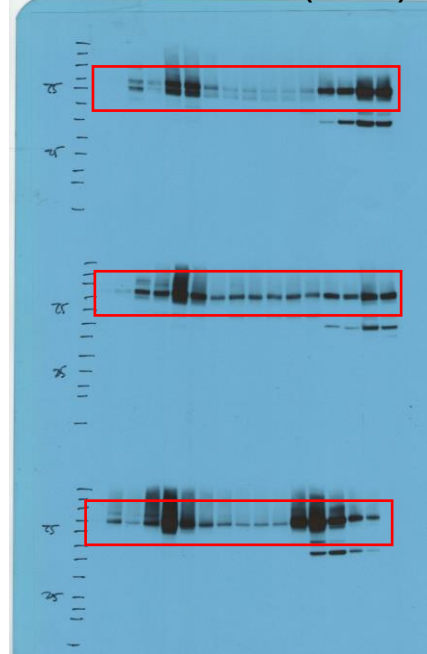

SCR  
+DMSO

SCR  
+fMLF

nSMase1 KO  
+fMLF

Rb anti- 5-LO (75 kDa)

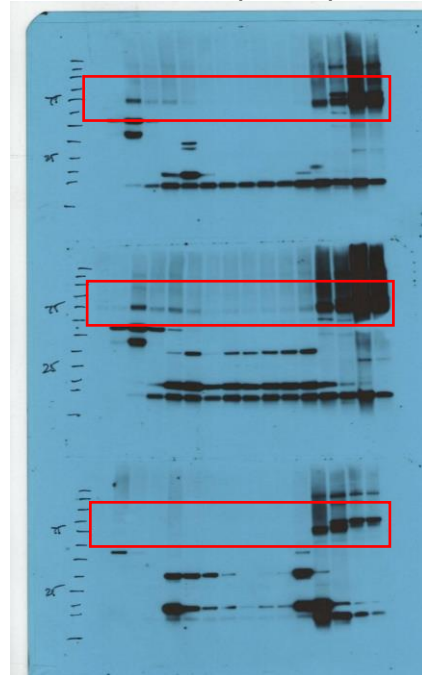

SCR  
+DMSO

SCR  
+fMLF

nSMase1 KO  
+fMLF

Rb anti-nSMase1 (50 kDa)

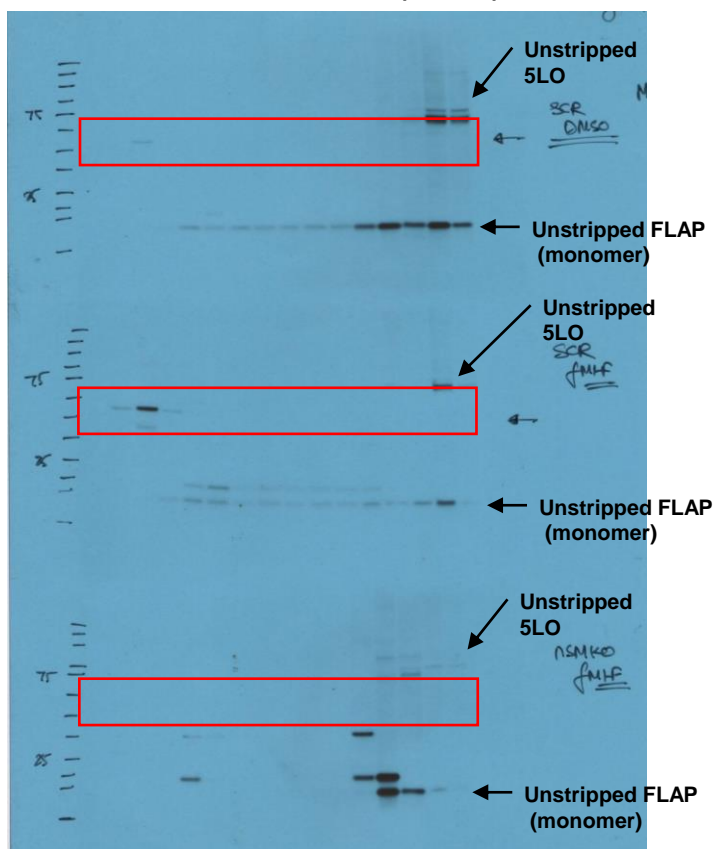

Unstripped  
5LO

Unstripped FLAP  
(monomer)

Unstripped  
5LO

Unstripped FLAP  
(monomer)

Unstripped  
5LO

Unstripped FLAP  
(monomer)

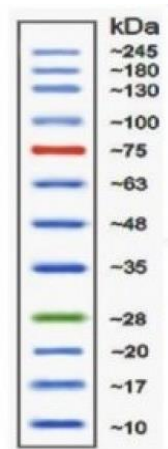

**Figure 2F**

**Cholera toxin-AlexaFlour 568**

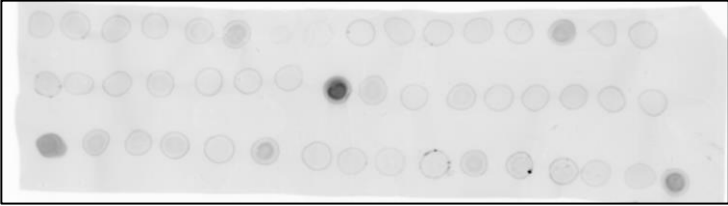

SCR+DMSO

SCR+fMLF

nSMase1 KO+fMLF

**Ms anti-Ceramide (Go-anti mouse IgM-Texas Red)**

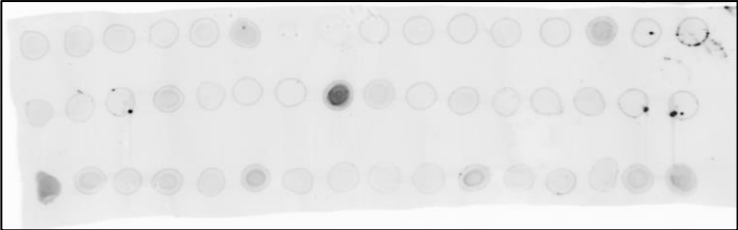

SCR+DMSO

SCR+fMLF

nSMase1 KO+fMLF
