# Supplementary material
Source: PubMed Central journal article supplement (PMC10211458)
Supplement: NIHMS1898489-supplement-Supplementary_Table_1.pdf [file NIHMS1898489-supplement-Supplementary_Table_1.pdf]

### Supplementary Table 1 STR analysis of PLB-985 cells

| % Match | Atcc Number | Designation                               | D5S818 | D13S317 | D7S820 | D16S539 | vWA | TH01 | AMEL | TPOX | CSF1PO |
|---------|-------------|-------------------------------------------|--------|---------|--------|---------|-----|------|------|------|--------|
| 93      | CCL-240     | HL-60Promyelocytic LeukemiaHuman          | 12     | 8,11    | 11,12  | 11      | 16  | 7,8  | X    | 8,11 | 13,14  |
| 93      | CRL-1964    | Clone 15 HL-60Promyelocytic LeukemiaHuman | 12     | 8,11    | 11,12  | 11      | 16  | 7,8  | X    | 8,11 | 13,14  |
| 93      | CRL-2257    | HL-60/MX2Mitoxant. Resist. HL-60Human     | 12     | 8,11    | 11,12  | 11      | 16  | 7,8  | X    | 8,11 | 13,14  |
| 92      | CRL-2258    | HL-60/MX1LeukemiaHuman                    | 12     | 8,11    | 11,12  | 11      | 16  | 7,8  | X    | 8    | 13,14  |
| 92      | CRL-3306    | HL-60/S4Acute MyeloblasticLeukemia; Human | 12     | 8,11    | 11,12  | 11      | 16  | 7    | X    | 8,11 | 13,14  |
