# Supplementary material
Source: PubMed Central journal article supplement (PMC10211458)

Extended data Figure 6C

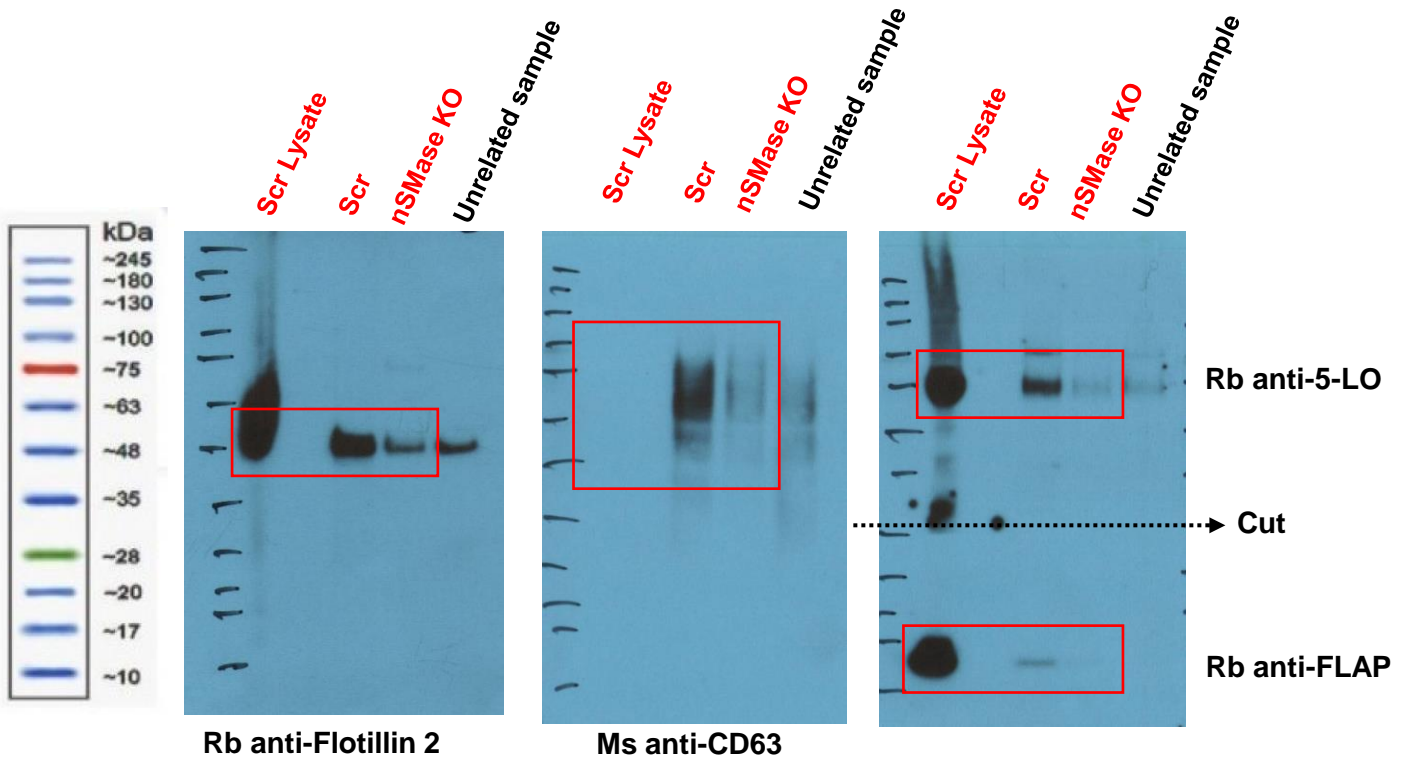

Supplement: NIHMS1898489-supplement-SourceData-Extended_DataFig6C.pdf [file NIHMS1898489-supplement-SourceData-Extended_DataFig6C.pdf]

Extended data Figure 7A

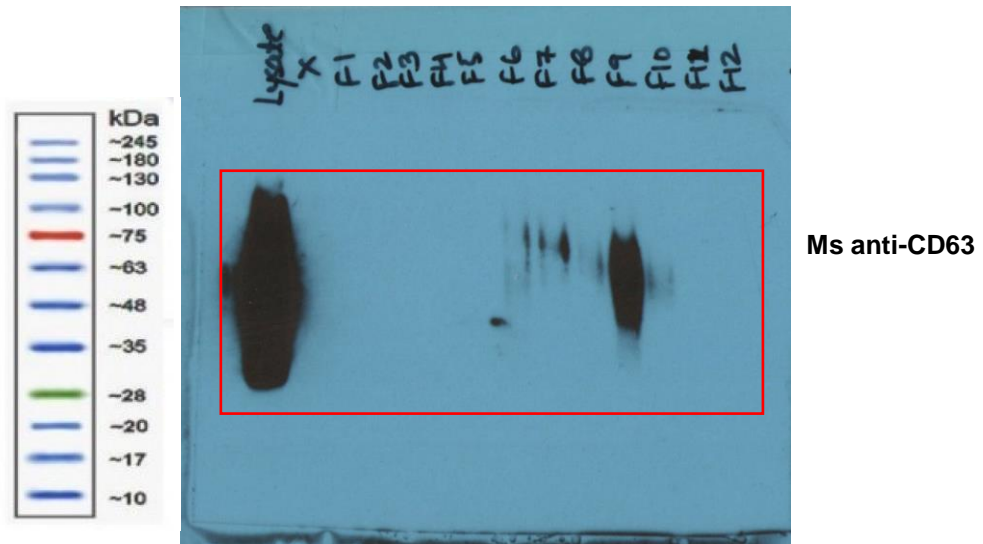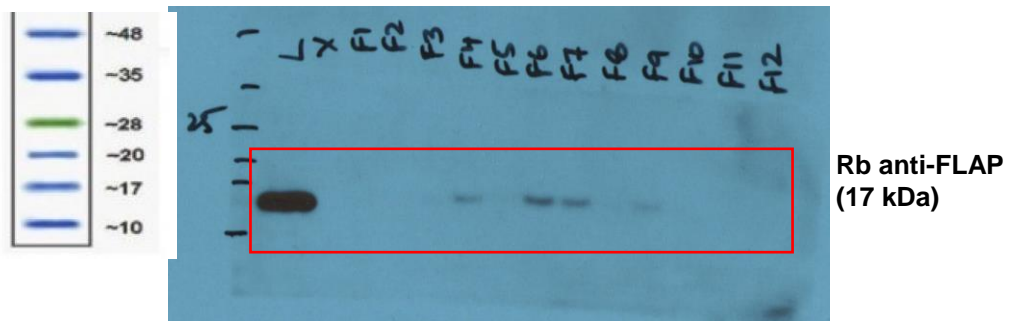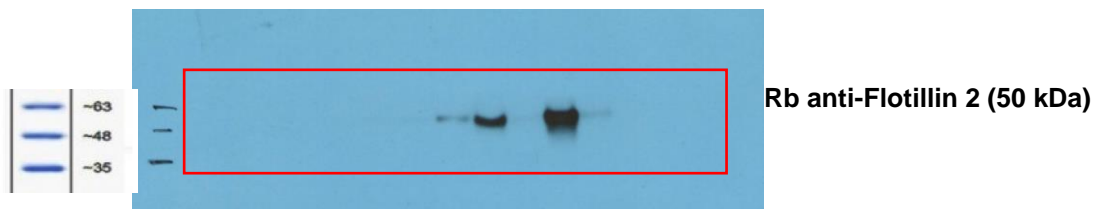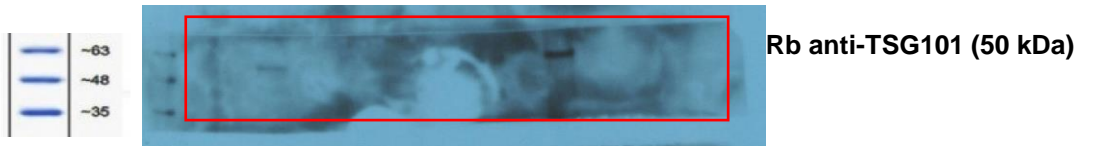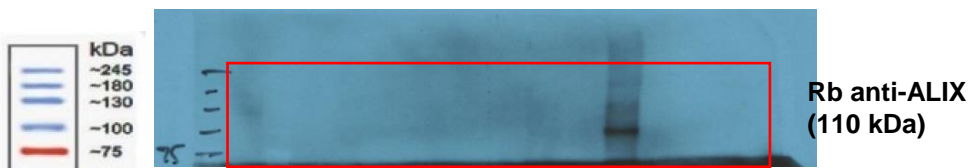

Supplement: NIHMS1898489-supplement-SourceData-Extended_DataFig7A.pdf [file NIHMS1898489-supplement-SourceData-Extended_DataFig7A.pdf]

Extended data Figure 2A

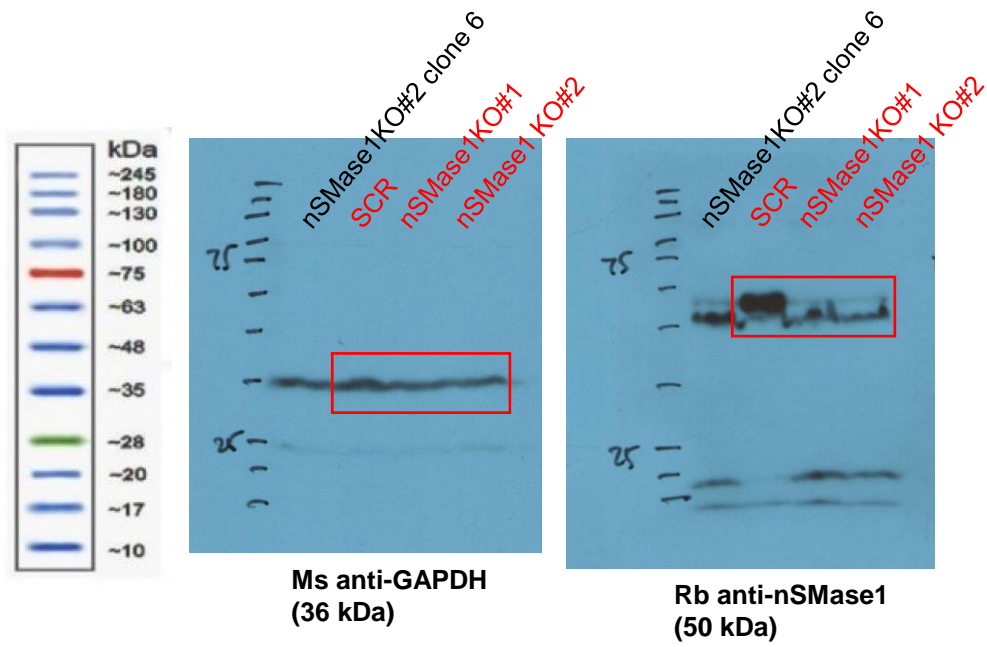

Supplement: NIHMS1898489-supplement-SourceData_ExtendedDataFig2A.pdf [file NIHMS1898489-supplement-SourceData_ExtendedDataFig2A.pdf]

Figure 5G

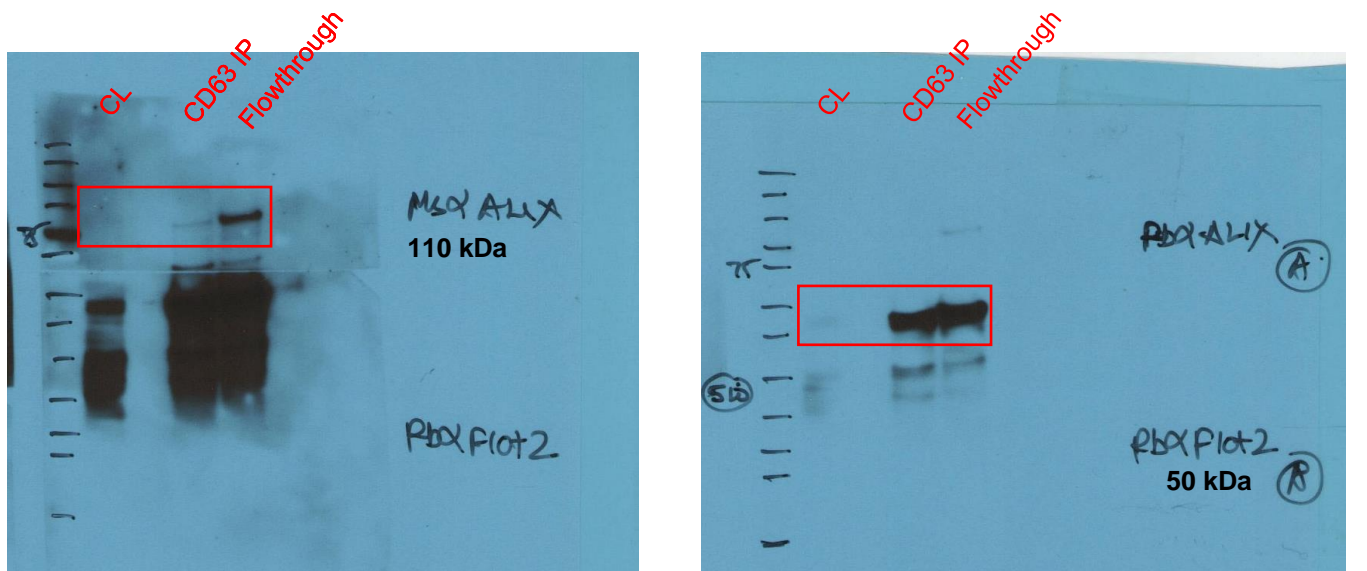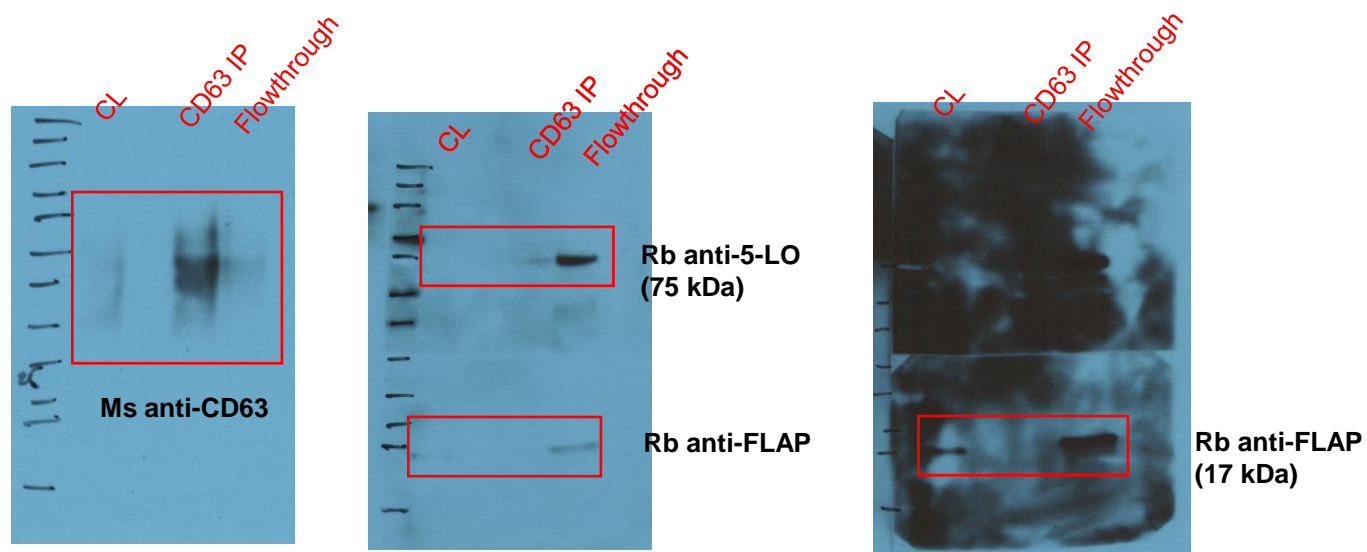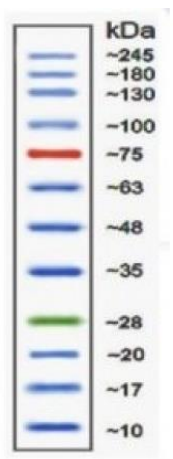

Supplement: NIHMS1898489-supplement-SourceData_Fig5G.pdf [file NIHMS1898489-supplement-SourceData_Fig5G.pdf]
